# Supplementary material
Source: publisher figshare collection journal article supplement (https://acs.figshare.com/ndownloader/files/3600675)
Supplement: Supplementary file 1 [file 3600675]

## SUPPORTING INFORMATION

### Measurement and Control of pH in the Aqueous Interior of Reverse Micelles

Bryan S. Marques,<sup>‡</sup> Nathaniel V. Nucci,<sup>‡</sup> Igor Dodevski, Kristina W.C. Wang, Evangelia A. Athanasoula, Christine Jorge, and A. Joshua Wand\*

Graduate Group in Biochemistry and Molecular Biophysics and Johnson Research Foundation and Department of Biochemistry and Biophysics, University of Pennsylvania Perelman School of Medicine, Philadelphia, PA 19104-6059, USA

<sup>‡</sup> These authors contributed equally.

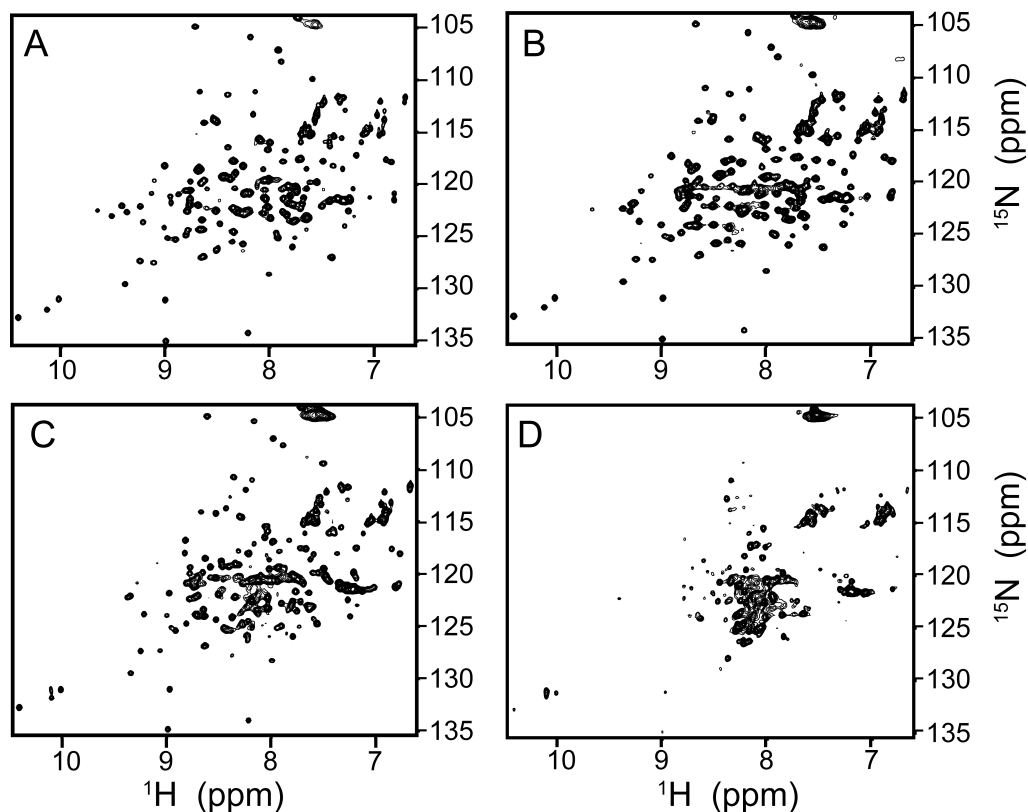

**Figure S1:**  $^{15}\text{N}$ -HSQC spectra of uniformly  $^{15}\text{N}$ -labeled T4 lysozyme L99A mutant in aqueous solution at varying pH to monitor protein foldedness. Aqueous L99A mutant of T4 lysozyme at pH 4.0 (A) is titrated down to a pH of 3.5 (B), 3.0 (C), and 2.5 (D) demonstrating a partial unfolding process as the protein solution becomes more acidic until pH 2.5 at which point lysozyme is completely unfolded. All aqueous protein samples had a final protein concentration of  $120\ \mu\text{M}$  in a buffer containing 50 mM sodium acetate and 50 mM NaCl.
